# Supplementary material
Source: Springer Nature journal article supplement (https://www.springermedizin.de/resource/supplementary/12885_2008_1551_MOESM2_ESM.pdf/9472302)

#1

#2

#3

I      NI      NI      N

PBL

ZR75-1

NTC

U MU MU MU MU MU MU MU MU M*WIF1*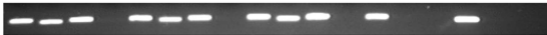

#82

#83

#84

#86

#87

#88

#90

#91

U MU MU MU MU MU MU MU M*WIF1*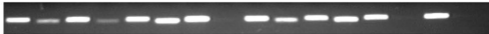

Supplement: MOESM2 [file 9472302]
